# Supplementary material for: In vivo alpha-V beta-3 integrin expression in human aortic atherosclerosis
Source: PubMed Central journal article supplement (PMC6929706; doi:10.1136/heartjnl-2019-315103), 2019-08-17
Supplement: heartjnl-2019-315103supp001.pdf [file heartjnl-2019-315103supp001.pdf]

## Supplementary Text and Data

### Computed Tomography Acquisition

Immediately after PET acquisition, thoracic CT angiography was performed: 330 ms rotation time, 100 (body mass index <25 kg/m<sup>2</sup>) or 120 (body mass index >25 kg/m<sup>2</sup>) kV tube voltage, 160-245 mAs tube current, 3.8 mm/rotation table feed, prospective (heart rate regular and <60 /min), or retrospective (heart rate >60 /min) electrocardiogram-gated. Depending on body mass index, a bolus of 80-100 mL contrast (400 mgI/mL; Iomeron, Bracco, Milan, Italy) was injected intravenously at 5 mL/s, after determining the appropriate trigger delay with a test bolus of 20 mL contrast material.

### PET Imaging

#### Kinetic Analysis

PET data were reconstructed (Ultra-HD, 2 iterations, 21 subsets, 256 pixels, 1.6-mm pixel size) in a dynamic profile using the following time frames; 60s x 5, 120s x 5, 180s x 5, 300s x 8.

Regions of interest (ROI's) were drawn both in the blood pool and sites of aortic atheroma visible on CT and used to derive time activity curves after decay correction. These were used to define a timeframe for static imaging based upon the point at which optimum contrast between blood pool and tissue activity was observed. To define 18F-fluciclatide uptake in aortic atheroma, a kinetic modeling input function calculation was based on the PET image-derived activity curve from the aortic blood pool.(8) (PMod version 4.3.1, Pmod technologies limited, Switzerland). This input function was applied to a tissue activity curve generated from ROI's placed in the myocardial interventricular septum, to estimate the tissue influx rate  $K_i$  (the slope

of the linear regression) and the volume of distribution (the intercept with the y axis) using a 2-tissue irreversible Patlak model, with  $t^*$  set to 20 min, as described previously (9,11). Thoracic 18F-fluciclatide dynamic activity was then normalized for the blood-pool input function on a voxel-by-voxel basis, and after 3D Gaussian filtering (5-mm FWHM), a parametric 3-dimensional image of 18F-fluciclatide uptake was generated accordingly. Using this image, regions of 18F-fluciclatide binding in the vasculature were identified and manually delineated for subsequent  $K_i$  analysis.

#### Histological Processing and Analysis

After obtaining informed consent, four human carotid intimal samples were obtained from patients undergoing carotid endarterectomy for symptomatic carotid artery atherosclerotic disease. Segments of dissected carotid atheroma were frozen in mounting medium. The tissue samples were then cut in sequential, longitudinal 4  $\mu\text{m}$  and 20  $\mu\text{m}$  slices sections at  $-20^\circ\text{C}$  and thaw-mounted onto microscope slides. Effort was made to align segments of ruptured plaque alongside non-atheromatous segments within the same slide. The slides were then dried for 15 min and spray-fixed with neutral buffered formalin. After rinsing in distilled water the 4  $\mu\text{m}$  sections were stained with hematoxylin-eosin (HE) and van-Gieson (VG) for conventional histopathological examination. In order to optimize immunohistochemistry, an antigen-unmasking step was performed by microwave treatment for 30 s. Endogenous peroxidase was blocked by incubation with hydrogen peroxide for 5 min. Sections were subsequently incubated with the primary antibodies; smooth muscle actin, CD31, CD68 (clone PG-M1), and integrin  $\alpha_v\beta_3$

antibody, clone LM609 (Millipore) for 30 min at room temperature. After washing, the sections were incubated with Envision Flex (DAKO, K5007) for 30 min at room temperature, followed by incubation with diaminobenzamine (Sigma) for 10 min. The slides were finally counterstained with hematoxylin and digitally imaged (Axioscan.Z1, Zeiss, UK).

Clinical PET systems have limited resolution. To gain more detailed information about the precise localization of  $^{18}\text{F}$ -fluciclatide binding in atherosclerotic tissue, we undertook autoradiography. The 20  $\mu\text{m}$  frozen sections adjacent to those used for immunohistochemical analysis were warmed to room-temperature and bathed in a solution of  $^{18}\text{F}$ -fluciclatide at a concentration close to in vivo imaging concentrations (1 kBq/mL) for 60 minutes and then rinsed with phosphate buffer solution. An unlabeled highly concentrated solution of fluciclatide was added to selected slides in order to competitively bind to  $\alpha_v\beta_3$  to assess for non-specific tracer uptake. A freshly blanked phosphor screen was then placed over the slides and an overnight exposure undertaken. The screen was read using a FujiFilm FLA-5100 Fluorescent Image Analyser (Raytek Scientific Limited, Sheffield, UK). Sections were then manually registered and examined for co-localization with histological markers of atherosclerotic disease activity.

Table S1 – Reproducibility Analysis

| <b>18F-Fluciclatide</b>                      |                                             | <b>Intra-class</b>             |
|----------------------------------------------|---------------------------------------------|--------------------------------|
| <b>Activity</b>                              | <b>Mean absolute difference<sup>a</sup></b> | <b>coefficient<sup>b</sup></b> |
| <b>Superior Vena Cava</b>                    |                                             |                                |
| <b>Mean SUV (SUV [kBq/cc])</b>               | -0.11 (-0.36 – 0.15)                        | 0.947                          |
| <b>Aorta</b>                                 |                                             |                                |
| <b>Mean SUV (SUV [kBq/cc])</b>               | -0.005 (-0.14 – 0.13)                       | 0.986                          |
| <b>Mean SUV<sub>MDS</sub> (SUV [kBq/cc])</b> | 0.01 (-0.17 – 0.15)                         | 0.980                          |
| <b>Max SUV (SUV [kBq/cc])</b>                | 0.07 (-0.13 – 0.27)                         | 0.971                          |
| <b>Max SUV<sub>MDS</sub> (SUV [kBq/cc])</b>  | 0.06 (-0.22 – 0.34)                         | 0.957                          |
| <b>Mean TBR</b>                              | 0.04 (-0.02 – 0.10)                         | 0.954                          |
| <b>Mean TBR<sub>MDS</sub></b>                | 0.04 (-0.04 – 0.10)                         | 0.940                          |
| <b>Max TBR</b>                               | 0.08 (-0.01 – 0.16)                         | 0.912                          |
| <b>Max TBR<sub>MDS</sub></b>                 | 0.07 (-0.03 – 0.17)                         | 0.919                          |
| <b>SUV<sub>Target-background</sub></b>       | 0.19 (-0.05 – 0.43)                         | 0.612                          |

<sup>a</sup> Mean difference between TBR<sub>max</sub> measurements (95% limits of agreement), and <sup>b</sup> ICC values for 18F-Fluciclatide throughout the thoracic aorta and SVC.

Abbreviations: ICC: intraclass correlation coefficient; MDS: most diseased segment; TBR: tissue to background ratio; SVC: Superior Vena Cava

Table S2 – Baseline demographic data

|                                    | All<br>(n=46) | Stable<br>Atherosclerosis<br>(n=27) | Stable<br>atherosclerosis;<br>matched group<br>(n=19) | Unstable<br>Atherosclerosis<br>(n=19) | P value |
|------------------------------------|---------------|-------------------------------------|-------------------------------------------------------|---------------------------------------|---------|
| Age (years)                        | 66±10         | 70±8                                | 68±7                                                  | 61±12                                 | 0.04    |
| Male Sex                           | 34 (74)       | 20 (74)                             | 15 (79)                                               | 14 (74)                               | 0.71    |
| BMI (kg/m <sup>2</sup> )           | 28±4          | 28±4                                | 26±4                                                  | 29±5                                  | 0.59    |
| Systolic BP (mmHg)                 | 140±22        | 149±19                              | 151±18                                                | 127±19                                | <0.001  |
| 18F-Fluciclatide dose<br>(MBq)     | 226±13        | 225±13                              | 225±13                                                | 228±14                                | 0.55    |
| <b>Cardiovascular History</b>      |               |                                     |                                                       |                                       |         |
| Angiographically<br>documented CAD | 26 (57)       | 7 (26)                              | 1 (5)                                                 | 19 (100)                              | <0.001  |
| Prev MI                            | 24 (52)       | 5 (19)                              | 0 (0)                                                 | 19 (100)                              | <0.001  |
| Prev PCI                           | 20 (43)       | 2 (7)                               | 0 (0)                                                 | 18 (95)                               | <0.001  |
| Prev CVD                           | 4 (11)        | 4 (14)                              | 3 (16)                                                | 0 (0)                                 | 0.08    |
| <b>Risk Factors</b>                |               |                                     |                                                       |                                       |         |
| Current smoker                     | 9 (20)        | 1 (4)                               | 0 (0)                                                 | 8 (42)                                | 0.001   |
| Diabetes Mellitus                  | 6 (13)        | 4 (14)                              | 2 (11)                                                | 2 (11)                                | 0.99    |
| Prior hypertension                 | 23 (50)       | 18 (67)                             | 11 (58)                                               | 6 (32)                                | 0.11    |
| Prior Hypercholester-<br>olemia    | 25 (54)       | 12 (44)                             | 6 (32)                                                | 12 (63)                               | 0.03    |
| hs-CRP (mg/l)                      | 3.5 [1.4-7.8] | 2.7 [1.4-5.8]                       | 3.0±2.4                                               | 5.6 [2.0-11.7]                        | <0.001  |
| Log <sub>10</sub> hs-CRP (mg/l)    | 0.51±0.51     | 0.41±0.44                           | 0.48±0.38                                             | 0.65±0.56                             | <0.001  |
| <b>Medications</b>                 |               |                                     |                                                       |                                       |         |
| Aspirin                            | 28 (61)       | 10 (37)                             | 5 (26)                                                | 19 (100)                              | <0.001  |
| Clopidogrel                        | 19 (41)       | 4 (14)                              | 3 (16)                                                | 19 (100)                              | <0.001  |
| Statin                             | 31 (67)       | 13 (48)                             | 5 (26)                                                | 19 (100)                              | <0.001  |
| β-Blocker                          | 27 (59)       | 8 (30)                              | 2 (11)                                                | 19 (100)                              | <0.001  |
| ACEi/ARB                           | 31 (67)       | 10 (37)                             | 4 (21)                                                | 18 (95)                               | <0.001  |
| Calcium Channel<br>Blocker         | 7 (15)        | 6 (22)                              | 4 (21)                                                | 1 (5)                                 | 0.11    |

Categorical data are displayed as n (%). Normally distributed data displayed as mean±SD. Non-normally distributed data displayed as median [interquartile range].

IHD - ischemic heart disease; AS - aortic stenosis; CAD - coronary artery disease; MI - myocardial infarction; CVD – cerebrovascular disease; PCI - percutaneous coronary intervention; hs-CRP - high sensitivity c-reactive protein; ACEi - ACE-inhibitor; ARB - Angiotensin Receptor Blocker.

\* P-values are quoted for comparisons between matched stable and unstable groups.

Table S3 – Imaging Results

|                                                | All<br>(n=46) | Stable<br>Atherosclerosis<br>(n=27) | Matched Stable<br>Atherosclerosis<br>(n=19) <sup>ψ</sup> | Unstable<br>Atherosclerosis<br>(n=19) | P<br>value* |
|------------------------------------------------|---------------|-------------------------------------|----------------------------------------------------------|---------------------------------------|-------------|
| <b>18F-Fluciclatide PET uptake</b>             |               |                                     |                                                          |                                       |             |
| SVC<br>(SUV <sub>mean</sub> )                  | 2.74±0.49     | 2.62±0.46                           | 2.54±0.40                                                | 2.9±0.48                              | 0.02        |
| Whole aorta<br>(mean SUV <sub>max</sub> )      | 3.59±0.62     | 3.40±0.62                           | 3.19±0.65                                                | 3.84±0.55                             | 0.001       |
| Ascending aorta<br>(mean SUV <sub>max</sub> )  | 3.60±0.66     | 3.42±0.70                           | 3.16±0.56                                                | 3.87±0.51                             | <0.001      |
| Aortic Arch<br>(mean SUV <sub>max</sub> )      | 3.51±0.62     | 3.29±0.61                           | 3.05±0.52                                                | 3.84±0.48                             | <0.001      |
| Descending aorta<br>(mean SUV <sub>max</sub> ) | 3.61±0.68     | 3.46±0.65                           | 3.28±0.65                                                | 3.83±0.66                             | 0.01        |
| Whole aorta<br>(mean TBR <sub>max</sub> )      | 1.32±0.14     | 1.30±0.12                           | 1.26±0.09                                                | 1.33±0.18                             | 0.14        |
| Ascending aorta<br>(mean TBR <sub>max</sub> )  | 1.32±0.16     | 1.31±0.17                           | 1.25±0.10                                                | 1.34±0.17                             | 0.05        |
| Aortic Arch<br>(mean TBR <sub>max</sub> )      | 1.30±0.14     | 1.26±0.14                           | 1.21±0.1                                                 | 1.33±0.15                             | 0.008       |
| Descending aorta<br>(mean TBR <sub>max</sub> ) | 1.32±0.17     | 1.32±0.13                           | 1.29±0.11                                                | 1.33±0.21                             | 0.56        |
| <b>CT Calcium Score</b>                        |               |                                     |                                                          |                                       |             |
| Whole aorta (AU)                               | 95 [0-852]    | 326 (11-1114)                       | 36 (0-469)                                               | 19 [0-483]                            | 0.85        |
| Ascending aorta (AU)                           | 0 [0-11]      | 0 (0-46)                            | 0 (0-0)                                                  | 0 [0-0]                               | 0.15        |
| Aortic arch (AU)                               | 29 [0-352]    | 102 (0-586)                         | 13 (0-469)                                               | 0 [0-263]                             | 0.76        |
| Descending aorta (AU)                          | 7.5 [0-78]    | 0 (0-123)                           | 0 (0-123)                                                | 8 [0-71]                              | 0.43        |
| <b>CTA Plaque analysis (descending aorta)</b>  |               |                                     |                                                          |                                       |             |
| Mean wall thickness<br>(% vessel diameter)     | 10.3±4.9      | 8.4±2.8                             | 8.4±3.1                                                  | 14.0±6.3                              | 0.003       |
| Plaque burden<br>(% total volume)              | 9.1±3.9       | 7.7±2.3                             | 7.7±2.5                                                  | 12.0±4.7                              | 0.004       |

<sup>ψ</sup> Stable group subjects paired to equivalent calcium score in unstable group.

\* *P-values are quoted for comparisons between matched stable and unstable groups.*

*SUV - standard uptake value; SVC – superior vena cava; TBR - tissue-to-background ratio*
